RESEARCH ARTICLE

# Patterns of sensitization to inhalant and food allergens among pediatric patients from the Moscow region (Russian Federation)

Sergei Voloshin<sup>1</sup>, Olga Smoldovskaya<sup>1\*</sup>, Guzel Feyzkhanova<sup>1</sup>, Alla Arefieva<sup>1</sup>, Lyudmila Pavlushkina<sup>2</sup>, Tatiana Filatova<sup>2</sup>, Veronika Butvilovskaya<sup>1</sup>, Marina Filippova<sup>1</sup>, Yuri Lysov<sup>1</sup>, Sergey Shcherbo<sup>2</sup>, Alexander Makarov<sup>1</sup>, Alla Rubina<sup>1</sup>, Alexander Zasedatelev<sup>1</sup>

**1** Engelhardt Institute of Molecular Biology, Russian Academy of Sciences, Moscow, Russia, **2** Filatov Moscow City Pediatric Clinic No. 13, Moscow, Russia

\* [o.smoldovskaya@gmail.com](mailto:o.smoldovskaya@gmail.com)

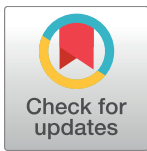

**OPEN ACCESS**

**Citation:** Voloshin S, Smoldovskaya O, Feyzkhanova G, Arefieva A, Pavlushkina L, Filatova T, et al. (2018) Patterns of sensitization to inhalant and food allergens among pediatric patients from the Moscow region (Russian Federation). *PLoS ONE* 13(3): e0194775. <https://doi.org/10.1371/journal.pone.0194775>

**Editor:** Takuma Kato, Mie Daigaku, JAPAN

**Received:** June 22, 2017

**Accepted:** March 11, 2018

**Published:** March 22, 2018

**Copyright:** © 2018 Voloshin et al. This is an open access article distributed under the terms of the [Creative Commons Attribution License](https://creativecommons.org/licenses/by/4.0/), which permits unrestricted use, distribution, and reproduction in any medium, provided the original author and source are credited.

**Data Availability Statement:** All relevant data are within the paper and its Supporting Information files.

**Funding:** This work was supported by the Russian Science Foundation (<http://rscf.ru/en>), Grant No. 14-50-00060. Optimization of the software for analysis of IgG4 profiles was supported by the Program of fundamental research for state academies for the period 2013 – 2020 (<http://fano.gov.ru/>), subprogram No. 01201363819. The funders had no role in study design, data collection

## Abstract

The immunological profiles of human specific IgE (sIgE) and specific IgG4 (sIgG4) vary by genetic predisposition, living conditions in different geographical locations and patient's age. The aim of our study was to analyze sIgE and sIgG4 patterns and their age-dependent changes in patients from the Moscow region. For identifying sIgE and sIgG4 profiles the blood samples from 513 patients aged 6 months to 17 years who were showing symptoms of allergic diseases were analyzed using microarrays containing 31 allergens. The highest sIgE prevalence was observed for birch pollen (32%) among pollen allergens, cat dander (24%) among indoor allergens, and egg whites (21%) among food allergens. The most common sIgG4 response was developed toward egg whites (80% of patients). Age-related elevation was identified for patients with increased sIgE to pollen allergens and indoor allergens (cat or dog dander and house dust mites). For each allergen, the proportion of cases with significant levels of sIgG4 appeared to increase with patients' age. The data on allergen-specific sIgE and sIgG4 prevalence show both general trends and some local special aspects that are indicative for the Moscow region. This information should be useful in terms of epidemiology of allergic diseases.

## Introduction

Currently, up to 20% of the adult population of developed countries and up to 40–50% of school children are affected by different allergic diseases [1]. It is well known that the formation of allergic diseases is associated with the increase in skin and mucus barrier permeability and based on genetic predisposition and adverse environmental conditions [2]. Thus, the recognition of allergens leading to certain adverse symptoms in different geographical regions is becoming more important not only for general allergology but also for the development of efficient methods of allergy diagnostics.

Allergen-specific immunoglobulin E (sIgE) is the main marker of type I hypersensitivity reaction to a certain agent. sIgE bound to an allergen is involved in the process of cross-linking

and analysis, decision to publish, or preparation of the manuscript.

**Competing interests:** The authors have declared that no competing interests exist.

of FcεRI receptors leading to basophil and mast cell activation followed by the inflammatory mediator release [2]. However, the occurrence of sIgE is not always accompanied by clinical symptoms.

Allergen-specific IgG and specifically IgG4 acting as blocking antibodies interfere IgE binding with allergens and prevent cross-linking of FcεRI receptors and further cellular activation [3]. Unlike the other IgG subclasses, IgG4 antibodies are involved in Fab-arm exchange resulting in the occurrence of antibodies with bivalent reactivity. Bispecific antibodies unable aggregate in large complexes with allergens to activate the complement system and to induce hypersensitivity reactions of types II and III [4]. That is why IgG4 presence likely leads to reduce clinical symptoms of allergy and in some cases, can indicate a tolerance to allergens [5,6]. In combination with sIgE concentrations, the sIgG4 levels may provide more inclusive information for *in vitro* analysis interpretation [7] and is mostly used to evaluate the efficiency of allergen-specific immunotherapy [8].

Currently, there are a number of studies describing the immunological profiles of sIgE [9,10] and sIgG4 [11], especially in relation to recombinant allergens, among patients with different pathologies in various geographical locations. However, Central Russia has been investigated less in the aforementioned studies.

To fill this gap in the research, we performed a screening analysis of blood samples from a representative (513 patients) group of patients from the Moscow region, as well as from a typical urban region of Central Russia that has an adverse ecological situation. The profiles of sIgE and sIgG4 were identified with microarrays containing 31 allergens for patients aged 6 months to 17 years with allergic symptoms.

## Materials and methods

### Participants

Patients from the Filatov Moscow City Pediatric Clinic No. 13 aged 6 months to 17 completed years with suspected allergic diseases or proven allergic diagnosis (pollinosis, allergic rhinitis, atopic dermatitis and bronchial asthma) were included in the study. The continuous recruitment was carried out from May, 2016 to December, 2016. Exclusion criteria were acute infectious diseases within 2 weeks before the blood sampling and the treatment by allergen-specific immunotherapy.

After the exclusion, totally 513 patients were enrolled. The written informed consent was obtained from one of the parents or guardians of the patients. The study was approved by local ethics committee of the Filatov Moscow City Pediatric Clinic No. 13.

All the patients were divided into 6 age groups: 0–1, 2–3, 4–5, 6–8, 9–13, 14–17, each containing from 77 to 94 participants.

### Samples

The surplus of blood serum samples of participants that were left over after routine diagnostic procedures were used for the analysis of allergen-specific IgE and IgG4. The blood samples were measured once for each subject. All of the samples were exposed to a single refrigeration cycle at -45°C.

### Analysis of blood serum on microarrays

The evaluation of sIgE and sIgG4 levels was performed using multiplex fluorescent microarray assays. Microarrays were developed as the matrix of hemispherical gel pads of 0.1 nl volume [12,13], and each pad contained one of the 31 immobilized allergens (GREER, Lenoir, NC, USA).

The protocol for the analysis and verification of this method were described in previous studies [14,15,16]. Briefly the procedure of the analysis on a microarray consisted of two steps: incubation with 65 µl of serum for 20 hours at 37°C and incubation with 50 µl of developing antibodies (solution of anti-IgE-Cy5 and/or anti-IgG4-Cy3 antibodies) for 1 hour at 37°C. Between these steps microarrays were washed with PBST (0.01 M phosphate buffer, pH 7.2, 0.15 M NaCl, 0.1% Tween-20 (Sigma, USA)) for 20 min and 30 min respectively.

The registration of fluorescence signals was performed using a two-wavelength microarray analyser (EIMB RAS) based on the concept of digital wide-field fluorescence microscopy [17]. The measuring range of the method is 0.25-100 IU/ml for sIgE and 100-2500 ng/ml for sIgG4.

The patient was considered sensitized (demonstrated increased sIgE level) to the allergen if the level of sIgE to this allergen exceeded the minimal threshold of 0.35 IU/ml. The level of sIgG4 in relation to the allergen was considered to be significant if the concentration of sIgG4 was more than 110 ng/ml.

### Data processing

The prevalence of sensitized individuals and the prevalence of subjects with a significant sIgG4 level were calculated for each of the age groups as the proportion of the patients with increased sIgE and significant sIgG4 for all the patients included in the group. 95% Confidence Intervals ("exact" Clopper-Pearson confidence interval [18]) for the observed proportions were calculated by MedCalc version 14.8.1. Statistical significance of the differences in proportions between various age groups was estimated according the results of the Fisher's exact test calculated by MedCalc. The differences were considered statistically significant for the pair-wise comparisons with  $p < 0.05$ .

Diagram plotting was performed using Microsoft Excel 2010.

### Results

In this study, 513 blood serum samples were analyzed from patients aged 6 months to 17 years who were showing symptoms of allergic diseases, such as pollinosis, atopic dermatitis, and bronchial asthma.

The number of patients grouped by age in 6 groups with or without increased levels of sIgE and significant levels of sIgG4 is presented in Table 1. Statistically significant male/female differences ( $p < 0.05$  according to Fisher exact test) in sIgE and sIgG4 profiles were not detected (data not shown), so the evaluation of immunoglobulin prevalence and age-dependent differences were considered for common groups including both males and females. Detailed information on sIgE and sIgG4 prevalence in relation to each allergen is given in S1 Table and Fig 1.

**Table 1. The number and percent of samples from patients with or without increased levels of sIgE (cut-off at 0.35 IU/ml) or significant levels of sIgG4 (cut-off at 110 ng/ml) to at least one allergen depending on age and gender (total sample size N = 513).**

| Groups, ages | Total    | Male         |              | Female       |              | Male        |             | Female      |             |
|--------------|----------|--------------|--------------|--------------|--------------|-------------|-------------|-------------|-------------|
|              |          | sIgE         | sIgE         | sIgE         | sIgE         | sIgG4       | sIgG4       | sIgG4       | sIgG4       |
|              |          | ≥ 0.35 IU/ml | < 0.35 IU/ml | ≥ 0.35 IU/ml | < 0.35 IU/ml | ≥ 110 ng/ml | < 110 ng/ml | ≥ 110 ng/ml | < 110 ng/ml |
| 0–1          | 81 (16%) | 13 (16%)     | 26 (32%)     | 20 (25%)     | 22 (27%)     | 26 (32%)    | 13 (16%)    | 21 (26%)    | 21 (26%)    |
| 2–3          | 90 (17%) | 27 (30%)     | 21 (23%)     | 28 (31%)     | 14 (16%)     | 43 (48%)    | 5 (6%)      | 38 (42%)    | 4 (4%)      |
| 4–5          | 77 (15%) | 27 (35%)     | 16 (21%)     | 19 (25%)     | 15 (19%)     | 42 (54%)    | 1 (1%)      | 32 (42%)    | 2 (3%)      |
| 6–8          | 85 (17%) | 42 (49%)     | 16 (19%)     | 18 (21%)     | 9 (11%)      | 56 (66%)    | 2 (2%)      | 25 (30%)    | 2 (2%)      |
| 9–12         | 94 (18%) | 32 (34%)     | 19 (20%)     | 30 (32%)     | 13 (14%)     | 47 (50%)    | 4 (4%)      | 42 (45%)    | 1 (1%)      |
| 13–17        | 86 (17%) | 39 (46%)     | 8 (9%)       | 25 (29%)     | 14 (16%)     | 47 (55%)    | 0 (0%)      | 39 (45%)    | 0 (0%)      |

<https://doi.org/10.1371/journal.pone.0194775.t001>

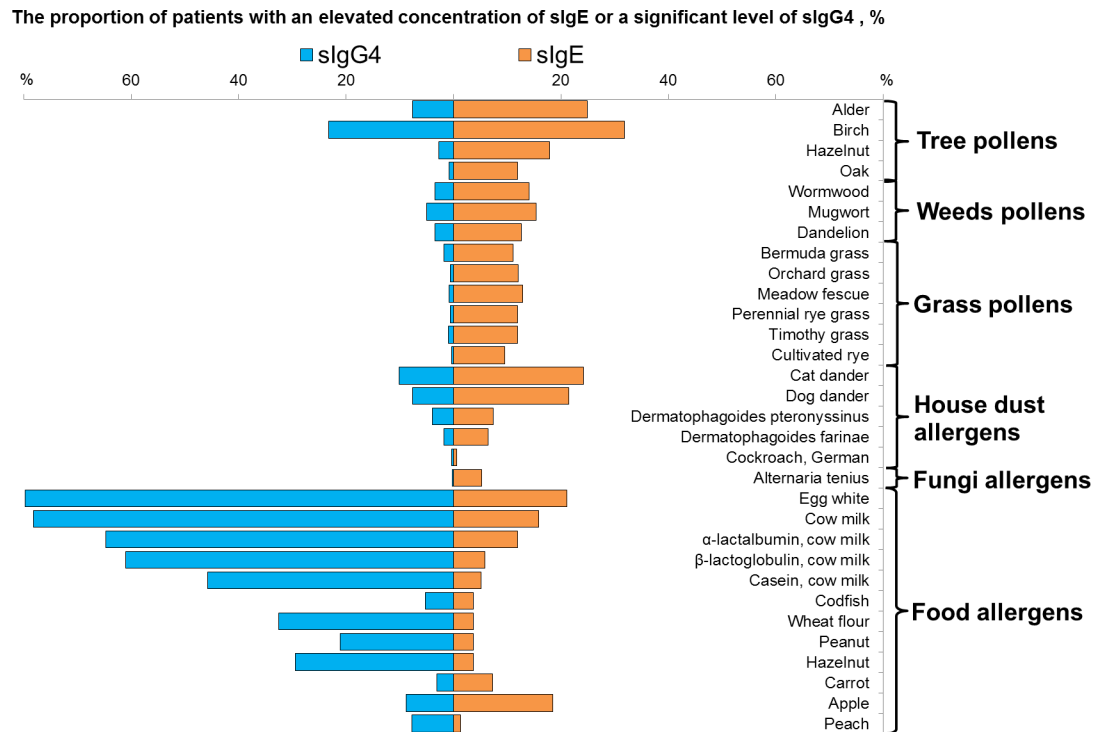

**Fig 1. The proportion of pediatric patients with allergic symptoms accompanied by allergen-specific IgE or IgG4 response.** Immunoglobulin response was considered to be present in cases of increased concentration of sIgE ( $\geq 0.35$  IU/ml) or a significant level of sIgG4 ( $\geq 110$  ng/ml) to allergens.

<https://doi.org/10.1371/journal.pone.0194775.g001>

Fig 1 shows that the most common allergens responsible for sIgE-mediated sensitization were birch pollen (32%), alder pollen (25%), cat dander (24%), dog dander (21%), and egg whites (21%). Other common allergens were grass pollen, cow milk and apples, for which rates of sensitization were in the range of 10-15%.

For comparison, rates of sensitization obtained in the study and the data from the two other investigations that describe sensitization among allergic populations in the Netherlands [19] and Taiwan [20] were added on Fig 2. The diagram shows that the degree of incidence of sIgE to dust mites in the Moscow region (7%) was much lower in comparison with Taiwanese patients (more than 50%). At the same time, rates of sensitization to cat or dog dander and egg whites in the Moscow region were considerably higher than in the other 2 regions of interest. These observations suggest that the external environment has a strong influence on the formation of the set of allergens that cause the majority of the allergic reactions.

As concerns sIgG4 prevalence, sIgG4 antibodies were detected most commonly in response to allergens such as egg whites (80% of patients) and cow milk and its components (46–65%). To a lesser degree, considerable levels of sIgG4 were reached in response to wheat flour (33%), peanuts and hazelnuts (21% and 29%, respectively), and birch pollen (23%) (Fig 1).

For most common allergens, the age-dependent changes in sIgE and sIgG4 prevalence were studied. The percentages of patients with significant levels of sIgE and sIgG4 as well as the 95% confidence intervals corresponding to these proportions are shown in Figs 3 and 4. Fig 3 illustrates the age-dependent increase in the ratio of patients with high levels of sIgE to pollen allergens and indoor allergens and the age-dependent decrease for sIgE against most food allergens, except for carrots, apples and peaches. The proportion of patients with significant levels of sIgG4 in response to each allergen increased with the age of the patients (Fig 4).

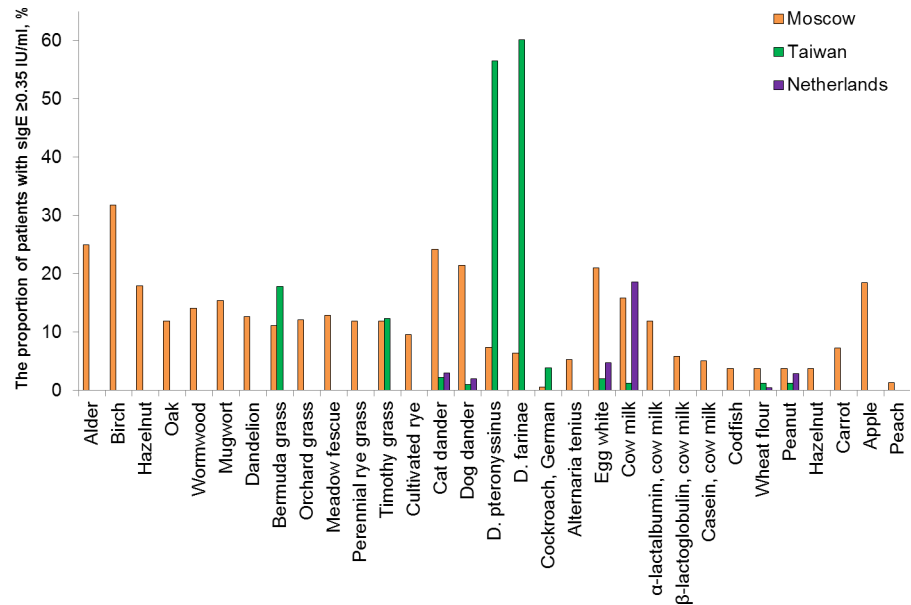

**Fig 2. Comparison of sensitization rates from different studies.** The proportion of samples with sIgE-increased concentration to each of the 31 allergens for children aged 0 to 17 years according to our data in comparison with the data of other studies conducted in the Netherlands [19] and Taiwan [20].

<https://doi.org/10.1371/journal.pone.0194775.g002>

Pairwise evaluation of statistical significance in sIgE and sIgG4 prevalence between the age groups for observed allergens (S2 Table) has shown significant differences for at least one of groups with younger patients (0–1, 2–3, 4–5) comparing to at least one of the groups with older patients (6–8, 9–12, 13–17) which proves the increasing or decreasing of antibody prevalence with aging.

## Discussion

This study is focused on the analysis of allergen-specific IgE and IgG4 profiles among 513 pediatric patients from the Moscow region who demonstrated allergic symptoms. Most of the previous studies describing allergy occurrence in European countries [21], Asia [22,23], the USA and Canada [24] usually cover only one group of allergens (foods or inhalant allergens) [25,26]. Furthermore, analysis of sensitization profiles for a great number of heterogeneous allergens is carried out in even fewer publications [27].

The major survey on allergies and asthma among children in Russia was carried out as part of The International Study of Asthma and Allergies in Childhood (ISAAC) [28]. The study was mostly focused on revealing and characterizing the allergy symptoms. Additionally, the most critical allergy vulnerability group of children under the age of 6 years was not taken into consideration. Examinations of sensitization profiles among mixed populations of children and adults were performed in Tomsk Oblast [29] and in Saint Petersburg [30].

Inhalant allergens that were included in our study are the most common allergens responsible for allergic rhinitis and rhinoconjunctivitis among Europeans. In Central Europe, sensitization to grass pollen, especially to timothy grass, prevails among pollen allergens [21]. According to our data, sensitization to tree pollens, in particular to birch pollen is prevalent in the Moscow region (Fig 1). This fact could be attributed to the high urbanization in this territory and the significant proportion of these types of trees among the local flora.

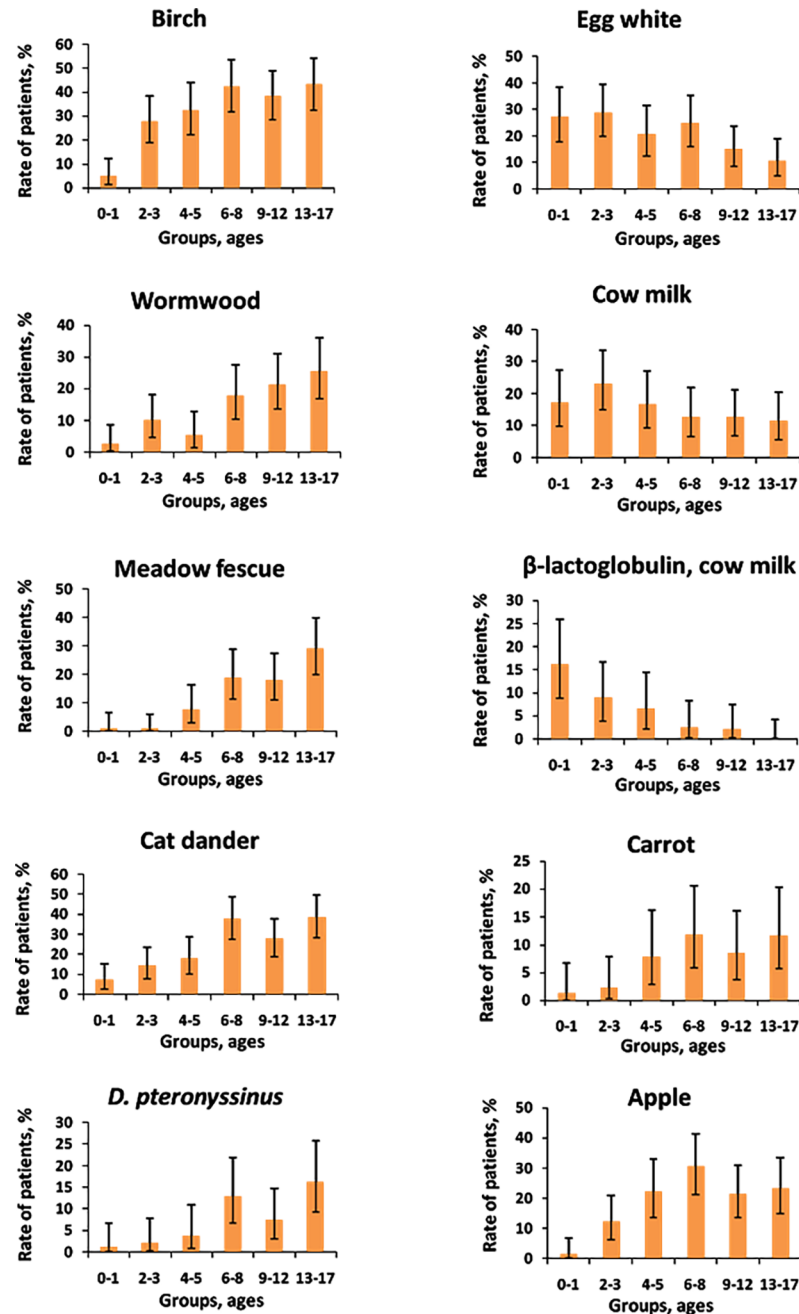

Fig 3. Age-dependent changes in the proportion of patients with increased concentrations of sIgE.

<https://doi.org/10.1371/journal.pone.0194775.g003>

Concerning the indoor allergens, cat dander is the prevailing allergen among sensitized children in the Moscow region (Fig 1). Sensitization to cat dander occurred in 24% of the patients in the study. Sensitization to house dust mites (*D. pteronyssinus* and *D. farinae*) is less common. sIgE response to *D. pteronyssinus* was detected only for 7% of the patients included in this study. Also, among the group of older patients aged from 13 to 17 years sensitization to *D. pteronyssinus* rises to 16% (Fig 3). It rivals with the percentage of senior schoolchildren showing reaction to dust mites or their main recombinant components in some other

European countries, for example, France (9,79% - 26,88% depending on the city [31]) and Poland (18% [32]).

House dust mite allergens are one of the most common allergens in Southeast Asia, Japan, Taiwan and other countries with the rates of sensitization as high as 60%. Such wide difference between dust mite sensitization reported in the studies concerning Asia and a number of European countries could be probably explained both by evaluation of sIgE sensitization in different age groups and by the different food habits including larger shellfish consumption in Asian cuisine. Sensitization to tropomyosin, which is responsible for cross-reactions between shellfish family and house dust mites [33,34], probably results in higher prevalence of sensitization to *D. pteronyssinus* and *D. farinae* in the regions characterized with increased shellfish consumption [35] (Fig 2).

According to the results obtained in this study, the majority of patients who are sensitized to food allergens are children under the age of 10 years (S1 Table). The most common sensitizing food agents for infants in the Moscow region are egg whites and cow milk (S1 Table), which corroborates the data from other countries across the world [1,36].

Sensitization to peanuts and hazelnuts among atopic children in the Moscow region is rarely observed, compared with allergens such as egg and cow milk. Nevertheless, peanuts and hazelnuts remain very important allergens, as they are responsible for up to 70–90% of all cases of food-induced anaphylactic reactions [37]. The sensitization rates of these allergens vary significantly depending on genetic factors and food habits of the examined patients [38]. For example, the rate of sensitization to peanuts and tree nuts may be up to 12.2% in European countries [39]; while in Asian countries, this type of sensitization is less common, and more significant allergens tend to be soybeans and shellfish [36].

Increased sIgE levels for carrots and apples were observed in 7% and 19% of atopic children that were involved in our study (Fig 1). This significant rate of sensitization can be explained by the high frequency of sensitization to pollen allergens and the cross-reactivity between aero-allergens, especially pollens, and plant food allergens due to the homologous major proteins of the different groups [40].

Age-related changes in the occurrence of sensitization to allergens in various groups of children in the Moscow region (Fig 3) correspond to trends that are observed in populations from other countries of the world [41], where the occurrence of sensitization to inhalant allergens increases with the age of the patients, whereas the number of patients who have sensitization to food allergens decreases with age. One exception, according to the data presented in Fig 3, is apples and carrots, which may show growth in sensitization associated with the birch pollen allergen [42].

In addition to the sIgE profile, sIgG4 profiles were evaluated for all patients. Significant levels of sIgG4 are associated with the formation of tolerance to certain allergens [43] since sIgG4 can act as a blocking antibody, preventing the binding of the allergen to sIgE and further cross-linking of mast cell receptors, followed by the release of inflammatory mediators. Additionally, an increase in the level of sIgG4 is an indicator of a change in Th1/Th2 balance, which in turn leads to a decrease in the synthesis of sIgE and a reduction in clinical symptoms [44].

In our study, the most significant level of sIgG4 was found for food allergens. Apparently, the increased synthesis of sIgG4 is a normal physiological response to consumption of proteins [45]. At the same time, for all of the allergens, there was, without exception, an age-dependent increase in the proportion of patients with a significant level of sIgG4 (Fig 4). This can be explained by the patient's immunological maturation and the ability of the organism to eliminate the specific allergen more quickly and efficiently, thus developing tolerance for food allergens in particular.

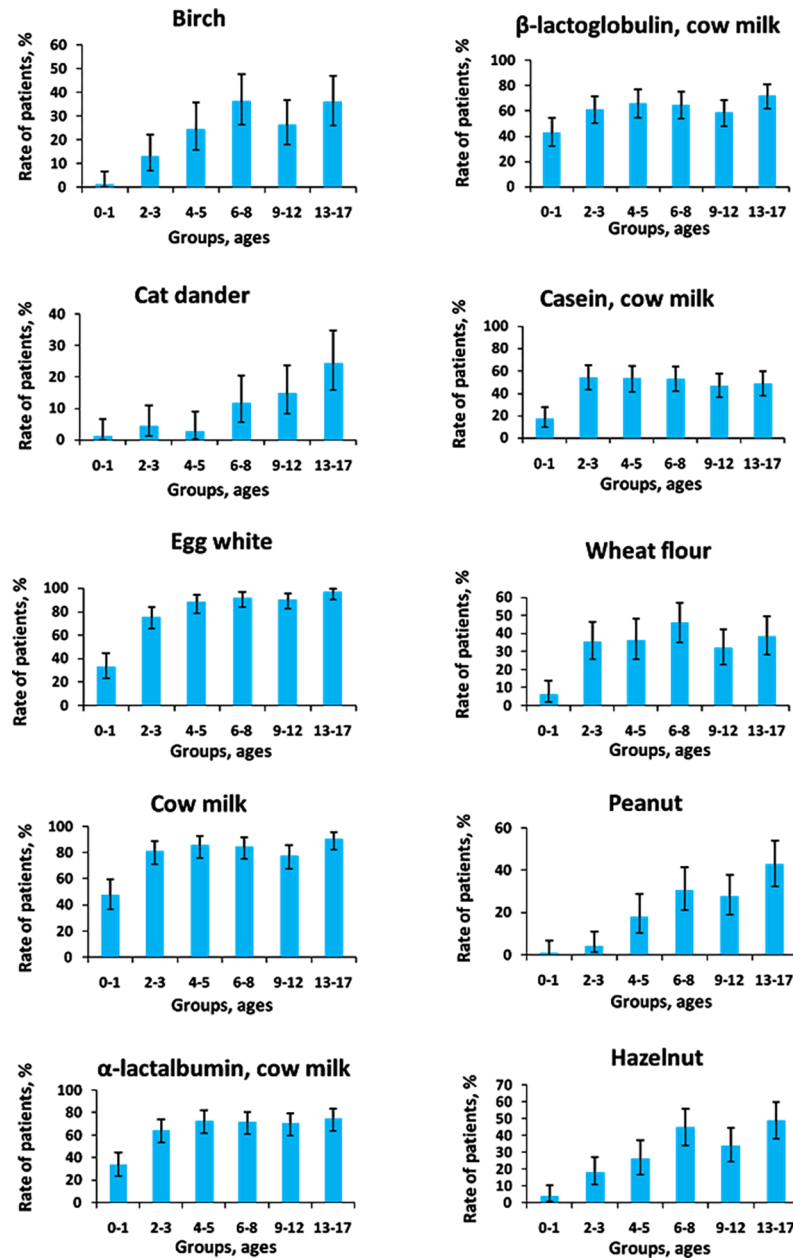

Fig 4. Age-dependent changes in the proportion of patients with significant concentrations of sIgG4.

<https://doi.org/10.1371/journal.pone.0194775.g004>

In our study, we analyzed the levels of IgE and IgG4 which are specific to the main allergens that cause sensitization in children, as well as the age-dependence of the sensitizing activity of allergens in the Moscow region. Information on the allergens that most often cause sensitization in a particular region may be of importance for effective diagnostics and treatment of atopic patients.

### Supporting information

S1 Table. Number of patients with sIgE and sIgG4 response and prevalence (%) of specific antibodies in different age groups. Conditional color formatting was used for the lines with



percentages (from green color for the lowest value to red color for the highest value).  
(XLSX)

**S2 Table. P-values obtained by Fisher's exact test for pair-wise comparisons of antibody prevalence in different age groups.**

(XLSX)

## Acknowledgments

We thank our collaborators from the Filatov Moscow City Pediatric Clinic No. 13 for the assistance in the work with patients' serum samples.

## Author Contributions

**Conceptualization:** Olga Smoldovskaya, Guzel Feyzkhanova, Veronika Butvilovskaya.

**Data curation:** Sergei Voloshin, Olga Smoldovskaya.

**Formal analysis:** Sergei Voloshin.

**Funding acquisition:** Alexander Makarov, Alexander Zasedatelev.

**Investigation:** Olga Smoldovskaya, Guzel Feyzkhanova.

**Methodology:** Olga Smoldovskaya, Lyudmila Pavlushkina, Tatiana Filatova, Veronika Butvilovskaya.

**Project administration:** Alexander Makarov, Alla Rubina, Alexander Zasedatelev.

**Resources:** Lyudmila Pavlushkina, Tatiana Filatova, Marina Filippova, Sergey Shcherbo.

**Software:** Yuri Lysov.

**Supervision:** Alla Rubina.

**Visualization:** Sergei Voloshin, Guzel Feyzkhanova, Yuri Lysov.

**Writing – original draft:** Sergei Voloshin, Olga Smoldovskaya, Guzel Feyzkhanova.

**Writing – review & editing:** Alla Arefieva, Marina Filippova, Sergey Shcherbo, Alla Rubina, Alexander Zasedatelev.

## References

1. Burks AW, Tang M, Sicherer S, Muraro A, Eigenmann PA, Ebisawa M et al. ICON: food allergy. *J Allergy Clin Immunol*. 2012; 129:906–920. <https://doi.org/10.1016/j.jaci.2012.02.001> PMID: 22365653
2. Bartůnková J, Kayserová J, Shoenfeld Y. Allergy and autoimmunity: parallels and dissimilarity: the yin and yang of immunopathology. *Autoimmun Rev*. 2009; 8:302–308. <https://doi.org/10.1016/j.autrev.2008.09.004> PMID: 18848649
3. van de Veen W, Akdis M. Role of IgG<sub>4</sub> in IgE-mediated allergic responses. *J Allergy Clin Immunol*. 2016; 138:1434–1435. <https://doi.org/10.1016/j.jaci.2016.07.022> PMID: 27566454
4. Scott-Taylor TH, Axinia SC, Amin S, Pettengell R. Immunoglobulin G; structure and functional implications of different subclass modifications in initiation and resolution of allergy. *Immun Inflamm Dis*. 2017.
5. Vazquez-Ortiz M, Pascal M, Jiménez-Feijoo R, Lozano J, Giner MT, Alsina L et al. Ovalbumin-specific IgE/IgG4 ratio might improve the prediction of cooked and uncooked egg tolerance development in egg-allergic children. *Clin Exp Allergy*. 2014; 44:579–588. <https://doi.org/10.1111/cea.12273> PMID: 24397754
6. Burnett M, Wegienka G, Havstad S, Kim H, Johnson CC, Ownby D et al. Relationship of dog- and cat-specific IgE and IgG4 levels to allergic symptoms on pet exposure. *J Allergy Clin Immunol Pract*. 2013; 1:350–353. <https://doi.org/10.1016/j.jaip.2013.03.011> PMID: 24565540

7. Ito K, Futamura M, Movérare R, Tanaka A, Kawabe T, Sakamoto T et al. The usefulness of casein-specific IgE and IgG4 antibodies in cow's milk allergic children. *Clin Mol Allergy*. 2012; 10:1. <https://doi.org/10.1186/1476-7961-10-1> PMID: 22212305
8. Matsuoka T, Shamji MH, Durham SR. Allergen immunotherapy and tolerance. *Allergol Int*. 2013; 62(4):403–413. <https://doi.org/10.2332/allergolint.13-RAI-0650> PMID: 24280670
9. Mittermann I, Wikberg G, Johansson C, Lupinek C, Lundeberg L, Cramer R et al. IgE Sensitization Profiles Differ between Adult Patients with Severe and Moderate Atopic Dermatitis. *PLoS One*. 2016; 1:e0156077.
10. Charpin D, Ramadour M, Lavaud F, Raheison C, Caillaud D, de Blay F et al. Climate and Allergic Sensitization to Airborne Allergens in the General Population: Data from the French Six Cities Study. *Int Arch Allergy Immunol*. 2017; 172:236–241. <https://doi.org/10.1159/000471511> PMID: 28456804
11. Beitia JM, López-Matas MA, Alonso A, Vega A, Mateo B, Cárdenas R et al. Allergenic profile to Phleum pratense and immunological changes induced after grass allergen-specific immunotherapy. *Int Arch Allergy Immunol*. 2014; 165:9–17. <https://doi.org/10.1159/000365866> PMID: 25277364
12. Rubina AY, Kolchinsky A, Makarov AA, Zasedatelev AS. Why 3-D? Gel-based microarrays in proteomics. *Proteomics*. 2008; 8:817–831. <https://doi.org/10.1002/pmic.200700629> PMID: 18214844
13. Feyzkhanovala GU, Filippova MA, Talibov VO, Dementieva EI, Maslennikov VV, Reznikov YP et al. Development of hydrogel biochip for in vitro allergy diagnostics. *J Immunol Methods*. 2014; 406:51–57. <https://doi.org/10.1016/j.jim.2014.03.003> PMID: 24631646
14. Feyzkhanovala G, Voloshin S, Smoldovskaya O, Arefieva A, Filippova M, Barsky V et al. Development of a microarray-based method for allergen-specific IgE and IgG4 detection. *Clin Proteomics*. 2017; 14:1.
15. Smoldovskaya O, Feyzkhanovala G, Arefieva A, Voloshin S, Ivashkina O, Reznikov Y et al. Allergen extracts and recombinant proteins: comparison of efficiency of in vitro allergy diagnostics using multiplex assay on a biological microchip. *Allergy Asthma Clin Immunol*. 2016; 12:9. <https://doi.org/10.1186/s13223-016-0117-1> PMID: 26973700
16. Rubina AY, Feizkhanovala GU, Filippova MA, Talibov VO, Fooke-Achterrath M, Zasedatelev AS. Multiplex assay of allergen-specific and total immunoglobulins of E and G classes in the biochip format. *Dokl Biochem Biophys*. 2012; 447:289–293. <https://doi.org/10.1134/S1607672912060063> PMID: 23288571
17. Lysov Y, Barsky V, Urasov D, Urasov R, Cherepanov A, Mamaev D, Yegorov Y, Chudinov A, Surzhikov S, Rubina A, Smoldovskaya O. Microarray analyzer based on wide field fluorescent microscopy with laser illumination and a device for speckle suppression. *Biomedical optics express*. 2017; 8:4798–4810. <https://doi.org/10.1364/BOE.8.004798> PMID: 29188082
18. Fleiss JL, Levin B, Paik MC. *Statistical methods for rates and proportions*, 3rd ed. Hoboken, USA: John Wiley & Sons; 2003.
19. De Jong AB, Dikkeschei LD, Brand PL. Sensitization patterns to food and inhalant allergens in childhood: a comparison of non-sensitized, monosensitized, and polysensitized children. *Pediatr Allergy Immunol*. 2011; 22:166–171. <https://doi.org/10.1111/j.1399-3038.2010.00993.x> PMID: 20633236
20. Yong SB, Wu CC, Tzeng YC, Hung WC, Yang KD. Different profiles of allergen sensitization in different ages and geographic areas in Changhua, Taiwan. *J Microbiol Immunol Infect*. 2013; 46:295–301. <https://doi.org/10.1016/j.jmii.2012.07.002> PMID: 23058910
21. Bousquet PJ, Chinn S, Janson C, Kogevinas M, Burney P, Jarvis D. Geographical variation in the prevalence of positive skin tests to environmental aeroallergens in the European Community Respiratory Health Survey I Allergy. 2007; 62:301–309. <https://doi.org/10.1111/j.1398-9995.2006.01293.x> PMID: 17298348
22. Zheng YW, Lai XX, Zhao DY, Zhang CQ, Chen JJ, Zhang L et al. Indoor Allergen Levels and Household Distributions in Nine Cities Across China. *Biomed Environ Sci*. 2015; 28:709–717. <https://doi.org/10.3967/bes2015.101> PMID: 26582093
23. Yeoh SM, Kuo IC, Wang DY, Liam CK, Sam CK, De Bruyne JA et al. Sensitization profiles of Malaysian and Singaporean subjects to allergens from *Dermatophagoides pteronyssinus* and *Blomia tropicalis*. *Int Arch Allergy Immunol*. 2003; 132:215–220. <https://doi.org/10.1159/000074302> PMID: 14646382
24. Lok SD, Davis BE, Cockcroft DW. Prevalence of allergen sensitization in 1000 adults in Saskatchewan. *Allergy Asthma Clin Immunol*. 2017; 13:9. <https://doi.org/10.1186/s13223-017-0181-1> PMID: 28194190
25. Inam M, Shafique RH, Roohi N, Irfan M, Abbas S, Ismail M. Prevalence of sensitization to food allergens and challenge proven food allergy in patients visiting allergy centers in Rawalpindi and Islamabad, Pakistan. *Springerplus*. 2016; 5:1330. <https://doi.org/10.1186/s40064-016-2980-0> PMID: 27563525
26. Chen Y, Wang H, Wong GWK, Zhong N, Li J. Allergen sensitization affected the change trend of prevalence of symptoms of rhinitis coexisting with wheeze among adolescents in Guangzhou City from 1994 to 2009. *Pediatr Allergy Immunol*. 2017; 28:340–347. <https://doi.org/10.1111/pai.12709> PMID: 28235144

27. Önell A, Hjälle L, Borres MP. Exploring the temporal development of childhood IgE profiles to allergen components. *Clinical and Translational Allergy*. 2012; 2:24. <https://doi.org/10.1186/2045-7022-2-24> PMID: 23254184
28. Mallol J, Crane J, von Mutius E, Odhiambo J, Keil U, Stewart A et al. The International Study of Asthma and Allergies in Childhood (ISAAC) Phase Three: a global synthesis. *Allergol Immunopathol (Madr)*. 2013; 41:73–85.
29. Ogorodova LM, Freidin MB, Sazonov AE, Fedorova OS, Gerbek IE, Cherevko NA et al. A pilot screening of prevalence of atopic states and opisthorchosis and their relationship in people of Tomsk Oblast. *Parasitol Re*. 2007; 101:1165–1168.
30. Aak OV, Sobolev AV. Features of sensitization to widespread allergens in residents of St. Petersburg and the Leningrad region with common allergic diseases. *Russian Allergy Journal*. 2013; 4:74–80.
31. Charpin D, Ramadour M, Lavaud F, Raheison C, Caillaud D, de Blay F, Pauli G, Annesi-Maesano I. Climate and Allergic Sensitization to Airborne Allergens in the General Population: Data from the French Six Cities Study. *Int Arch Allergy Immunol*. 2017; 172:236–241. <https://doi.org/10.1159/000471511> PMID: 28456804
32. Mazur A, Szylling A, Bielecka T, Strzelak A, Kulus M. Is the "farm effect" hypothesis still current? Atopy and allergic diseases in rural and urban children in Poland. *J Asthma*. 2017; 6:1–9.
33. Wong L, Huang CH, Lee BW. Shellfish and House Dust Mite Allergies: Is the Link Tropomyosin? *Allergy Asthma Immunol Res*. 2016; 8:101–106. <https://doi.org/10.4168/aaair.2016.8.2.101> PMID: 26739402
34. Farioli L, Losappio LM, Giuffrida MG, Pravettoni V, Micarelli G, Nichelatti M, Scibilia J, Mirone C, Cavalarin L, Lamberti C, Balossi LG, Pastorello EA. Mite-Induced Asthma and IgE Levels to Shrimp, Mite, Tropomyosin, Arginine Kinase, and Der p 10 Are the Most Relevant Risk Factors for Challenge-Proven Shrimp Allergy. *Int Arch Allergy Immunol*. 2017; 24:3–4.
35. Woo CK, Bahna SL. Not all shellfish "allergy" is allergy! *Clinical and Translational Allergy*. 2011; 1:3.
36. Lee S. IgE-mediated food allergies in children: prevalence, triggers, and management. *Korean J Pediatr*. 2017; 60:99–105. <https://doi.org/10.3345/kjp.2017.60.4.99> PMID: 28461822
37. McWilliam V, Koplin J, Lodge C, Tang M, Dharmage S, Allen K. The Prevalence of Tree Nut Allergy: A Systematic Review. *Curr Allergy Asthma Rep*. 2015; 15:54. <https://doi.org/10.1007/s11882-015-0555-8> PMID: 26233427
38. Dalal I, Binson I, Reifen R, Amitai Z, Shohat T, Rahmani S et al. Food allergy is a matter of geography after all: sesame as a major cause of severe IgE-mediated food allergic reactions among infants and young children in Israel. *Allergy*. 2002; 57:362–365. PMID: 11906370
39. Burney PG, Potts J, Kummeling I, Mills EN, Clausen M, Dubakiene R et al. The prevalence and distribution of food sensitization in European adults. *Allergy*. 2014; 69:365–371. <https://doi.org/10.1111/all.12341> PMID: 24372074
40. Steckelbroeck S, Ballmer-Weber BK, Vieths S. Potential, pitfalls, and prospects of food allergy diagnostics with recombinant allergens or synthetic sequential epitopes. *J Allergy Clin Immunol*. 2008; 121:1323–1330. <https://doi.org/10.1016/j.jaci.2008.04.008> PMID: 18472149
41. Chiu CY, Huang YL, Tsai MH, Tu YL, Hua MC, Yao TC et al. Sensitization to food and inhalant allergens in relation to atopic diseases in early childhood: a birth cohort study. *PLoS One*. 2014; 9:e102809. <https://doi.org/10.1371/journal.pone.0102809> PMID: 25033453
42. Ivković-Jureković I. Oral allergy syndrome in children. *Int Dent J*. 2015; 65:164–168. <https://doi.org/10.1111/ijdj.12164> PMID: 25819922
43. Matsumoto N, Okochi M, Matsushima M, Kato R, Takase T, Yoshida Y et al. Peptide array-based analysis of the specific IgE and IgG4 in cow's milk allergens and its use in allergy evaluation. *Peptides*. 2009; 30:1840–1847. <https://doi.org/10.1016/j.peptides.2009.07.005> PMID: 19619602
44. Gocki J, Bartuzi Z. Role of immunoglobulin G antibodies in diagnosis of food allergy. *Postepy Dermatol Alergol*. 2016; 33:253–256. <https://doi.org/10.5114/ada.2016.61600> PMID: 27605894
45. Tomićić S, Norrman G, Fälth-Magnusson K, Jenmalm MC, Devenney I, Böttcher MF. High levels of IgG4 antibodies to foods during infancy are associated with tolerance to corresponding foods later in life. *Pediatr Allergy Immunol*. 2008; 20:35–41. <https://doi.org/10.1111/j.1399-3038.2008.00738.x> PMID: 18346097
